# Supplementary material for: The effects of calcination atmosphere on the catalytic performance of Ce-doped TiO2 catalysts for selective catalytic reduction of NO with NH3
Source: Royal Society of Chemistry journal article supplement (doi:10.1039/c7ra03166a), 2017-01-01
Supplement: c7ra03166a1.pdf [file c7ra03166a1.pdf]

# The effects of calcination atmosphere on the catalytic performance of Ce-doped TiO<sub>2</sub> catalysts for selective catalytic reduction of NO with NH<sub>3</sub>

Yiqing Zeng<sup>a</sup>, Shule Zhang<sup>a,\*</sup>, Yanan Wang<sup>a</sup>, Guangli Liu<sup>b</sup>, Qin Zhong<sup>a,\*</sup>

<sup>a</sup> School of Chemical Engineering, Nanjing University of Science and Technology, Nanjing 210094, PR China

<sup>b</sup> Lanzhou Petrochemical Research Center, PetroChina, Lanzhou 730060, PR China

\* Corresponding author, Tel.: +86 25 84315517, fax: +86 25 84315517, E-mail: shulezhang@163.com

## Supplementary Material

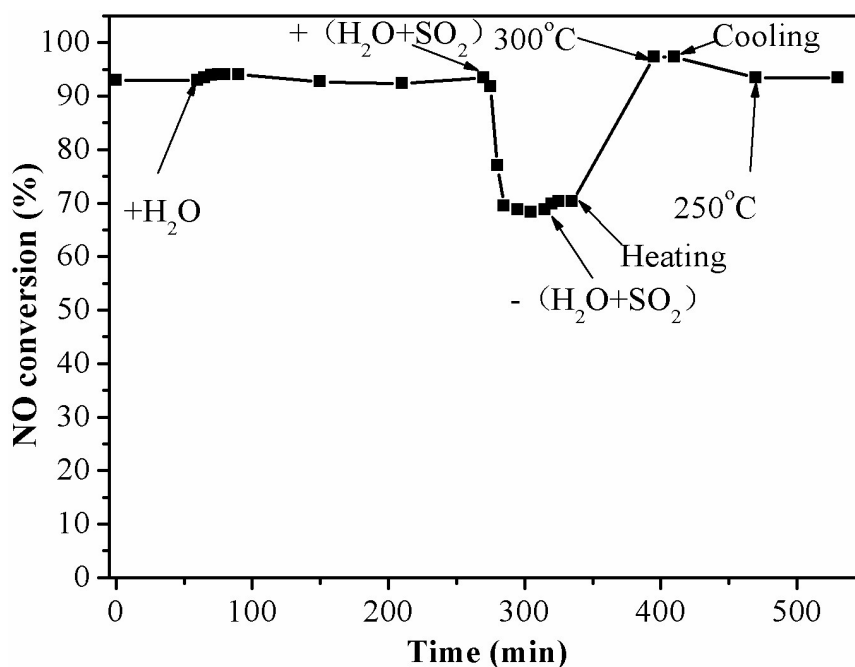

Fig S1 3 vol% and/or 300 ppm SO<sub>2</sub> resistance testing over Ce<sub>5</sub>-Ti-N<sub>2</sub> at 250 °C

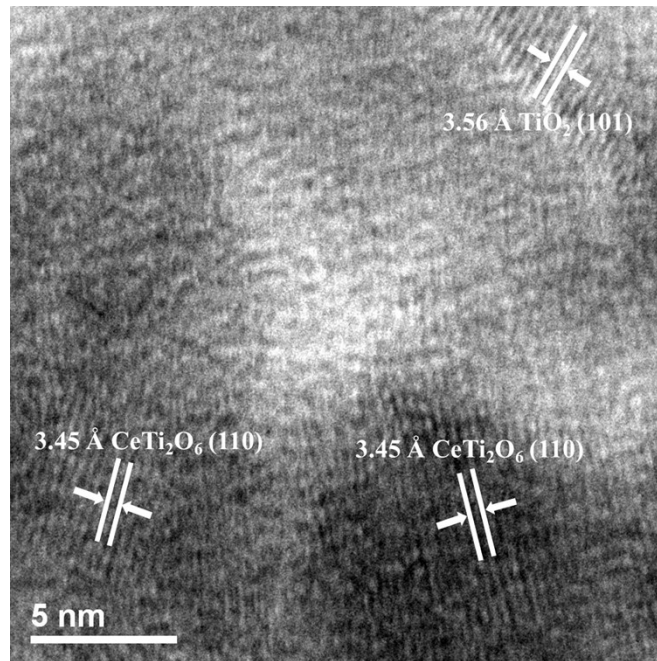

Fig S2 The HR-TEM image of Ce<sub>5</sub>-Ti-N
